April 10, 2018

## **DNA local structure decreases mutation rates**

Chaorui Duan<sup>1,4,6,7</sup>, Qing Huan<sup>1,4,7</sup>, Xiaoshu Chen<sup>2,7</sup>, Shaohuan Wu<sup>1,4,6</sup>, Lucas B. Carey<sup>5</sup>, Xionglei He<sup>3</sup>, and Wenfeng Qian<sup>1,4,6</sup>

<sup>1</sup> State Key Laboratory of Plant Genomics, Institute of Genetics and Developmental Biology, Chinese Academy of Sciences, Beijing 100101, China

<sup>2</sup> Human Genome Research Institute and Department of Medical Genetics, Zhongshan School of Medicine, Sun Yat-sen University, Guangzhou 510080, China

<sup>3</sup> State Key Laboratory of Biocontrol, School of Life Sciences, Sun Yat-sen University, Guangzhou 510275, China

<sup>4</sup> Key Laboratory of Genetic Network Biology, Institute of Genetics and Developmental Biology, Chinese Academy of Sciences, Beijing 100101, China

<sup>5</sup> Department of Experimental and Health Sciences, Universitat Pompeu Fabra, Barcelona 08003, Spain

<sup>6</sup> University of Chinese Academy of Sciences, Beijing 100049, China

<sup>7</sup> These authors contributed equally to this work

Correspondence to:

Wenfeng Qian

Institute of Genetics and Developmental Biology

Chinese Academy of Sciences

Beijing 100101, China

Email: [wfqian@genetics.ac.cn](mailto:wfqian@genetics.ac.cn)

**Running title:** Intrinsic DNA curvature decreases local mutation rates

## **ABSTRACT**

### **Background**

Mutation rates vary across the genome. Whereas many *trans* factors that influence mutation rates have been identified, as have specific sequence motifs at the 1-7 bp scale, *cis* elements remain poorly characterized. The lack of understanding why different sequences have different mutation rates hampers our ability to identify positive selection in evolution and to identify driver mutations in tumorigenesis.

### **Results**

Here we show, using a combination of synthetic genes and sequencing of thousands of isolated yeast colonies, that intrinsic DNA curvature is the major *cis* determinant of mutation rate. Mutation rate negatively correlates with DNA curvature within genes, and a 10% decrease in curvature results in a 70% increase in mutation rate. Consistently, both yeast cells and human tumors accumulate mutations in regions with small curvature. We further show that this effect is due to differences in the intrinsic mutation rate, likely due to differences in mutagen sensitivity, and not due to differences in the local activity of DNA repair.

### **Conclusions**

Our study establishes a framework in understanding the *cis* properties of DNA sequence in modulating the local mutation rate and identifies a novel causal source of non-uniform mutation rates across the genome.

**Keywords:** DNA shape; mutation rate; mutational landscape

## BACKGROUND

Mutation is the ultimate source of genetic diversity. Therefore, the measurement of mutation rate and particularly, the identification of the *trans* factors and *cis* elements that influence mutation rate are a focus of intense interest in evolutionary biology. A large number of *trans* factors influencing mutation rate have been identified [1], such as chromatin remodelers, histone-modifying enzymes, and other DNA binding proteins [2-4]. In addition, replication timing [5-9] and transcription rate [10-14] also affect mutation rate.

*Cis* elements may play a more important role in determining the local mutation rate, yet remain poorly understood. Studies of *cis* elements that determine local mutation rate have been limited to the scale of a few neighboring nucleotides around a mutation site for the past few decades [15-18].

There is comprehensive *cis* information in the shape of DNA. Although the double-helix structure of DNA is usually described as a twisted ladder, the steps of the ladder are not rigidly aligned. The local shape of DNA is affected by the interactions of neighboring bases [19, 20]. For example, the size of the minor and major grooves varies depending on the local sequence. Such variation in DNA shape affects the ability of proteins to bind to DNA and the accessibility of each nucleotide [20, 21]. Through its effect on DNA-protein and/or DNA-solvent interactions, the shape of the double helix may influence the local mutation rate. However, the role of DNA shape in influencing local mutation rate has not been systematically studied. Here, we provided several lines of evidence that intrinsic DNA curvature affects the local mutation rate in a quantitative and predictable manner. Our study therefore expands our knowledge of *cis* elements that regulate mutation rate by integrating information regarding the physical shape of the double helix and develops a new framework to understand the evolution of local mutation rate.

## RESULTS AND DISCUSSION

### Characterization of the mutational landscape of *URA3*

To quantitatively determine how *cis* elements affect the local mutation rate we first characterized the mutational landscape of an endogenous gene, *URA3*, in *Saccharomyces cerevisiae*. *URA3* encodes an enzyme required for uracil synthesis and converts the non-toxic molecule 5-fluoroorotic acid (5-FOA) into the toxic 5-fluorouracil. Only cells bearing loss-of-function mutations in *URA3* can survive on 5-FOA plates, making *URA3* a model gene to study mutation rate [5, 22]. Here, we cultured wild-type yeast in synthetic complete (SC) media for 24 hours to allow mutations to accumulate and spread these cells onto a 5-FOA plate (**Fig. 1A**). We then sequenced *URA3* of each randomly picked visible colony and identified mutations. We performed 135 biological replicates in parallel and sequenced a total of ~1,000 *URA3* variants from 135 plates (**Table S1**). Identical mutations (same type at the same position) identified on the same plate were counted only once because such mutations are most likely resulted from cell proliferation from a single mutation and not independent identical mutations.

To measure bias in mutation rate, we need to determine the number of observed mutations and to compare it with the number expected if the mutation rate was uniform. As the missense mutations that would permit growth on 5-FOA is unknown, we focused our analysis on nonsense mutants. There are 104 potential nonsense mutation sites in *URA3*. For each of them, we counted the number of 5-FOA plates where each nonsense mutation was observed (**Fig. 1B**). This number varied between 0 and 8 (**Fig. 1B**). To determine if this variation in frequency could be fully explained by the inherently stochastic nature of mutation, we randomly assigned each of the observed 154 nonsense mutations to a potential nonsense mutation site. We then calculated the standard deviation of the observed numbers of nonsense mutations on these sites and that in the permutation. The observed standard deviation was significantly greater than the random expectation ( $P < 0.001$ , **Fig. 1C**), suggesting the presence of *cis* elements that affect the local mutation rate.

A nonsense mutation may not always lead to a loss of function, especially when it occurs near the stop codon. This would also lead to a non-Poisson distribution of observed mutations. To exclude this confounding factor we repeated the permutation test using only the first two-thirds of the coding sequence. Again, the observed standard deviation was significantly greater than the random expectation (**Fig. S1A**). Similar results were also obtained when we performed the permutation test separately for the 54 nonsense transitions and the 100 nonsense transversions (**Fig. S1B-C**). Taken together, the variation in the frequency of nonsense mutations within *URA3* suggests the presence of *cis* elements that modulate local mutation rate.

## Mutations in *URA3* tend to occur in DNA regions with a smaller intrinsic DNA curvature

One possible explanation for the non-Poisson distribution of observed nonsense mutations is the difference in the mutation rate into a stop codon of each of the four bases. Nucleotides A and T had a lower mutation rate than G and C (**Fig. S2**), likely explained by the AT rich nature of the three stop codons. That is, G>A and C>T transitions often result in stop codons but A>G and T>C transitions do not. To explore the predictive power of the nucleotide at each position and to identify additional *cis* sequence features predictive of local mutation rates, we constructed a set of linear models that take into account various sequence features (**Table 1**). Including the nucleotide at the potential nonsense site in the linear model decreases the Akaike information criterion (AIC) of the model, indicating an increase in the model's ability to predict mutation rates (**Table 1**, model 1 and model 2). Surprisingly, including the +1 and -1 bases into the model did not further improve the predictive power, nor did including the heptanucleotide sequence context (**Table 1**, models 3 and 4).

To identify additional DNA sequence features predictive of local mutation rates we used a sliding window to divide the *URA3* gene into overlapping regions of  $L$  nucleotides ( $L=10, 20 \dots$ , or 100 bp). We calculated the average mutation rate in each region as the total number of observed nonsense mutations in this region normalized by the number of potential nonsense mutation sites (**Fig. S3A**). For each region we then calculated 17 DNA properties such as GC content, thermodynamic characteristics, groove properties, and DNA shape features using well-established computational methods [19, 23] (**Fig. S3B**). Finally, for each window size, we calculated the correlation between mutation rate and each of the DNA properties.

Over a large range of window sizes, mutation rate was most strongly correlated with intrinsic DNA curvature, defined as the sequence-dependent deflection of DNA axis due to the interaction between neighboring base pairs [24] (e.g., for a window size  $L$  of 100 bp,  $\rho = -0.49$ ,  $P = 2 \times 10^{-5}$ , Spearman's correlation, **Fig. 2A-B**). Consistently, including intrinsic DNA curvature into the aforementioned linear model enhances its predictive power (**Table 1**, models 5 and 6). It is worth noting that tilt, the DNA property exhibiting the second strongest correlation with mutation rate, is a component of intrinsic DNA curvature [24].

The correlation between mutation rate and DNA curvature was not confounded by GC content [17, 25] which in our data was not correlated with mutation rate (**Fig. 2A**). We previously showed that nucleosome binding suppresses spontaneous mutations [26]. To quantitatively determine the relationship between mutation rate, nucleosome occupancy,

and DNA curvature, we performed high-throughput sequencing on nucleosome protected DNA fragments. Consistent with previous results, nucleosome occupancy was negatively correlated with the average mutation rate ( $r_{URA3} = -0.35$ ,  $P = 0.002$ ). Nevertheless, the correlation between DNA curvature and mutation rate persisted after controlling for nucleosome occupancy (partial  $r_{URA3} = -0.6$ ,  $P = 1 \times 10^{-8}$ ), suggesting that the relationship between mutation rate and DNA curvature is not due to differences in nucleosome occupancy.

As a form of experimental cross-validation to determine if our results from *URA3* are generalizable to other genes, we used an independently generated set of mutations in the gene *CAN1* [22], for which nonsense mutations were selected using the arginine analogue canavanine. Intrinsic DNA curvature is also predictive of mutation rate in *CAN1* (**Fig. 2C** and **Table S2**).

### **Mutations in yeast cells and in human tumors accumulate in DNA regions with smaller intrinsic DNA curvature**

To determine if DNA shape affects mutation rate at the genomic scale, we used a mutation accumulation assay in which spontaneous mutations accumulate at  $\sim 100\times$  the normal rate due to a mutation in a gene related to DNA mismatch repair, *MSH2* [27]. We retrieved all 882 mutations that were supported by an at least  $20\times$  coverage in the high-throughput sequencing data. We calculated the intrinsic DNA curvature of a region from 50 bp upstream to 50 bp downstream of each mutation. As a control we randomly chose 882 sites with identical 3-nucleotide contexts (the mutation site, +1, and -1 sites) from the rest of the genome. We performed this random sampling procedure 1,000 times. We found that the observed mutations were located in regions with a smaller intrinsic DNA curvature ( $P = 0.04$ , permutation test, **Fig. 2D**). It suggests that in the genome as a whole, regions with smaller intrinsic DNA curvature have higher mutation rates.

Mutations generate genetic variation among cells within multi-cellular individuals, and somatic mutations play a vital role in cancer development and progression. Mutations in tumors are distributed unevenly across the genome and within individual genes [2, 3, 9, 16, 28]. We therefore performed the same genome-scale analysis as in yeast using 10,429 cancer samples from 26 cancer types collected in The Cancer Genome Atlas (TCGA) database [29]. We calculated the average intrinsic curvature of the DNA regions from 50 bp upstream to 50 bp downstream of each identified SNP for each cancer type. As a control, we randomly chose the same number of DNA sites from the genome. Consistent with the results in yeast, mutations were significantly enriched in regions with a smaller intrinsic DNA curvature in all cancer types ( $P < 0.001$ , permutation test, **Fig. 3** and **Fig. S4**), suggesting that intrinsic DNA curvature reduces mutation rates in human tumor

cells. The large number of mutations in tumor cells permitted a more robust test of the effect for nucleotide context. We found that DNA curvature negatively correlates with mutation rate when controlling for the trinucleotide (**Fig. S5**) or heptanucleotide context (**Fig. S6**). Taken together, DNA curvature is a robust predictor of non-uniform mutation rates in both yeast cells and human tumors.

### **Genetic manipulation of DNA curvature affects mutation rate**

To further examine the causal effect of intrinsic DNA curvature on mutation rate we designed four synonymous variants of *URA3* (**Table S3**), two with increased curvature and two with decreased curvature (**Fig. 4A**). We kept features that may influence local mutation rate such as GC content, codon usage, and predicted local mRNA structure largely unchanged (**Table S4**) [13, 17, 25]. The expression levels of *URA3* in these variants are also identical (**Fig. S7**).

We used an electrophoretic mobility shift assay to confirm that the intrinsic DNA curvature was altered in these variants [30-32]. Variants with a greater predicted intrinsic DNA curvature [19, 23] migrated more slowly than those with a smaller curvature (**Fig. S8**), presumably due to the different friction force that they encountered in the process of migration.

To determine if genetic manipulation of curvature alters mutation rate we cultured cells with each of the five *URA3* variants in SC media to allow mutations to accumulate, spread cells onto 5-FOA plates, and counted the number of colonies on each plate (**Fig. 4B**). We calculated the mutation rate of each variant from the fraction of plates without mutants [33] and found that variants with a 10% smaller intrinsic DNA curvature had a 70% higher mutation rate (**Fig. 4C**). It suggests that experimental decreasing DNA curvature increases mutation rate.

### **Intrinsic DNA curvature alters the mutation rate, not mismatch repair efficacy**

There are two non-mutually exclusive mechanisms by which intrinsic DNA curvature can modulate the net mutation rate [9]. First, intrinsic DNA curvature may reduce the supply of mutations. Second, intrinsically curved DNA may facilitate the recruitment of mismatch repair-related proteins, which can increase the DNA repair efficacy [3, 9]. To determine if intrinsic DNA curvature reduces the supply of mutations or affects repair efficiency, we knocked out *MSH2* and repeated the mutation accumulation experiment (**Fig. 4B**). In the absence of Msh2, the effect of DNA curvature on mutation rate is even larger; a 10% decrease in curvature results in a 100% increase in mutation rate (**Fig. 4D**).

This observation suggests that the altered net mutation rate by DNA curvature is due to differences in the supply of mutations and not to differences in DNA repair efficacy.

### **DNA curvature reduces mutagen sensitivity in cancer cells**

DNA curvature may reduce the mutation rate by making the DNA sequence less accessible to potential mutagens [26] or by affecting the fidelity of DNA polymerase itself, though this is unlikely, as DNA polymerase acts on single stranded DNA. To distinguish these two mechanisms we divided the SNPs in cancer cells into six categories based on mutation types and asked if the rate of mutation types that are sensitive to mutagens is more affected by DNA curvature. C>T transitions mainly result from the hydrolytic deamination on methylated cytosine [15, 34]. The rate of C>T transition reduced by 40% in DNA regions with greater curvature (**Fig. 5A**). In contrast, this reduction in mutation rate was not observed for other mutation types (**Fig. 5A**).

Furthermore, C>A transversions in lung cancer cells are mainly caused by polycyclic aromatic hydrocarbons in tobacco smoke [35-37]. C>A mutations are more affected by DNA curvature in lung cancer than they are in other types of cancer (**Fig. 5B**). Both biased distributions of C>T and C>A mutations suggest that curvature protects DNA from mutagens. Given the well-established role of DNA curvature in regulating protein-DNA interactions [20, 21], it is possible that DNA curvature promotes protein binding that makes DNA less accessible to mutagens.

### **Implications in evolutionary genomics**

Understanding the variation in mutation rate is central to numerous questions in evolutionary genetics. Particularly, modeling the variability in mutation rate among sites of a genome is of key importance in studies of molecular evolution because it provides a null model that can be rejected when natural selection occurs. Sequence-intrinsic *cis* elements are more computationally tractable than *trans* factors in modeling mutation rate in molecular evolution studies, because with *cis* elements the expected mutation rate can be predicted directly from the surrounding sequences of a site [16]. For example, the evolutionary rates of genes have been extensively studied, and particularly, comparisons between those of essential and nonessential genes have been made [38-42]. Previous studies focused on the difference in the strength of negative selection and neglected the potential difference in mutation rate, presumably because the latter was hard to model. In this study, we discovered that a key DNA shape feature, intrinsic DNA curvature, modulated local mutation rate. Interestingly, we observed that essential genes exhibit a greater DNA curvature in both yeast (**Fig. S9**) and humans (**Fig. S10**), suggesting that



they have a lower mutation rate. This observation urges the need of considering the difference in mutation rate when compare evolutionary rate among genes.

Furthermore, the high-density fitness landscapes of random mutations on a gene have been extensively characterized in previous studies [43, 44], aiming to understand the trajectory of biological evolution. However, evolutionary trajectories are determined by natural selection acting on mutations. Inherent biases in the generation of the random mutations must therefore be taken into account. Our study on mutational landscape complements these previous studies on fitness landscapes and will significantly contribute to the ultimate understanding of evolutionary trajectories [45].

## **CONCLUSIONS**

We found that the shape of the DNA double helix plays a major role in determining the local mutation rate. In particular, we identified a key feature, intrinsic DNA curvature, that determines the local mutation rate in both yeast and cancer cells. We genetically manipulated the intrinsic DNA curvature and observed an altered mutation rate consistent with the genome-wide data. We showed that this effect is due to increased mutation rate, likely due to increased exposure to mutagens, and not due to differential efficacy of repair machinery. Taken together, our study extensively expands our knowledge of elements that regulate mutation rate by integrating the valuable information of DNA shape, and develops a new framework to understand evolution and tumorigenesis at a nucleotide resolution.

## METHODS

### Characterization of the mutational landscape of *URA3*

A haploid *S. cerevisiae* strain derived from the W303 background, GIL104 (*MATa URA3, leu2, trp1, CAN1, ade2, his3, bar1Δ::ADE2*), was used to characterize the mutational landscape of *URA3*. Cells from a single colony were cultured in 5 ml SC media with uracil dropped-out (SC-uracil) at 30°C for 24 hours. Cells were then transferred into 5 ml fresh SC media (at an initial OD<sub>660</sub> ~0.1) and grown for 24 hours to accumulate mutations. ~5.0×10<sup>7</sup> cells were spread onto SC-uracil plates containing 1 g/l 5-FOA to select for loss-of-function mutants of *URA3*. A total of ~1,000 *ura3* variants were isolated from 5-FOA plates and were Sanger sequenced separately. PCR and Sanger sequencing primers are listed in **Table S5**.

### Calculation of the mutation rate and the values of DNA properties in *URA3* and *CAN1*

We identified a total of 452 mutations in *URA3* (**Table S1**), including 5 synonymous mutations, 293 missense mutations, and 154 nonsense mutations. We focused on these 154 nonsense mutations in this study for the sake of accuracy in estimating mutation rate. To be specific, we need to count the number of potential loss-of-function mutation sites, which would be used to normalize the number of observed mutations and hence to calculate the mutation rate. The number of potential loss-of-function missense mutations was difficult to estimate because it remains elusive which missense mutations lead to a loss of function and which do not. Mutation rate was determined using overlapping windows with size equal to *L* nucleotides (*L*= 10, 20 ..., or 100 bp, **Fig. S3A**). The window slid for 10 nucleotides each movement. The value of a DNA shape feature were calculated based on the frequencies of all 16 possible combinations of dinucleotide in a region, following previous studies [19, 23]. The value of each dinucleotide for each DNA shape feature was obtained from the DNA ‘PROPERTY’ database [46] and was shown in **Fig. S3B**. GC content was calculated with a Perl script.

### Estimation of nucleosome occupancy

The wild-type *S. cerevisiae* strain (BY4741 *URA3*) was grown to log-phase in YPD (1% yeast extract, 2% peptone, and 2% dextrose) liquid medium. We performed nucleus isolation, micrococcal nuclease (MNase) digestion, and chromatin preparation as described previously [47], with the following modifications. We adjusted NP-S buffer to 0.5 mM spermidine, 0.075% (v/v) NP-40, 50 mM NaCl, 50 mM Tris-HCl pH 7.5, 5 mM MgCl<sub>2</sub>, and 5 mM CaCl<sub>2</sub>, and used 100 units of MNase to digest the nuclei for 5 minutes. We performed Protease K digestion and extracted the core particle DNA. Paired-end libraries were constructed using Illumina-compatible DNA-Seq NGS library preparation kit from Gnomagen and were sequenced with Illumina HiSeq 2500 (PE125, paired-end

2×125 bp). ~10.6 million clean reads were aligned to the *S. cerevisiae* genome using bowtie2 with default parameters [48]. Nucleosome occupancy of a nucleotide was defined as the number of read pairs uniquely mapped to the genome region covering the nucleotide. The raw sequencing data of MNase-seq have been deposited to the Genome Sequence Archive [49] in BIG Data Center (<http://bigd.big.ac.cn/gsa>), Beijing Institute of Genomics, Chinese Academy of Sciences, under accession number CRA000570.

### Generation and analyses of the *URA3* variants

We designed four synonymous variants of *URA3* with different intrinsic DNA curvature (**Tables S3-4**). We estimated the minimum free energy (MFE) for all 20 nucleotide windows in the coding sequence with RNAfold [50], and defined the average MFE of them as the strength of the RNA secondary structure of a variant. Codon adaptation index (CAI) was calculated following our previous study [51]. Four *URA3* variants were synthesized by Wuxi Qinglan Biotech and the wild-type *URA3* DNA sequence was amplified from S288C. Primers are listed in **Table S5**. Each of the five variants was introduced into the chromosomal location of *URA3* in BY4741 (*MATa his3Δ1 leu2Δ0 met15Δ0 ura3Δ0*) with homologous recombination.

We used electrophoretic mobility shift assay to confirm the difference in intrinsic DNA curvature of the five synonymous variants. We loaded an equal amount of PCR products of five variants into a 12% native polyacrylamide gel. We performed the electrophoresis experiment in the TBE buffer (89 mM Tris, 89 mM boric acid, and 2.5 mM EDTA, pH 8.0) for 12 hours at 120 V.

Total RNA was extracted with hot acidic phenol (pH < 5.0) and was reverse transcribed with the GoScript™ reverse transcriptase. Quantitative PCR (qPCR) was carried out on the Mx3000P qPCR System (Agilent Technologies) using Maxima SYBR Green/ROX qPCR Master Mix. *ACT1* was used as the internal control. Primers used are listed in **Table S5**.

The variance-to-mean ratio of the numbers of colonies on the plates was much greater than 1 for each variant (**Fig. S11**), indicating that the number of colonies does not follow a Poisson distribution [33]. This suggests that the observed mutations most likely occurred in the liquid culture instead of on the plates. We used the non-parametric Mann-Whitney *U* test to compare the number of colonies among these strains. We also estimated the relative mutation rates in these variants from  $p_0$ , the proportion of cultures with no mutants, in the wild-type background with the following equation [33].

$$\text{mutation rate} = -\ln(p_0)$$

### Estimation of mutation rate in yeast mutation accumulation (MA) lines

A previous study identified ~1,000 single nucleotide mutations by sequencing the genomes of five MA lines of a mismatch repair-deficient *S. cerevisiae* strain (BY4741 *msh2::kanMX4*) [27]. The mutation data from this study was used because the efficacy of purifying selection in MA experiments [17, 22] was further reduced in mutators. We analyzed the mutations supported by  $\geq 20\times$  coverage and retrieved 882 single nucleotide mutations that were identified in at least one of the five replicates from this study. As a control, we chose 882 random sites in the rest of the yeast genome and defined them as the pseudo-mutation sites. We calculated the average intrinsic DNA curvature around these pseudo-mutation sites and repeated this procedure for 1,000 times. *P* values were calculated as the fraction of pseudo-mutation sets exhibiting a smaller average intrinsic DNA curvature than that of the observed mutation sites among 1,000 permutations.

### **Estimation of mutation rate in human cancer cells**

The data of SNPs in cancer cells were retrieved from The Cancer Genome Atlas (TCGA) database [29]. Chromosomal sequences surrounding these SNPs were retrieved from Ensembl release 87 ([www.ensembl.org](http://www.ensembl.org)). When multiple projects for a cancer type exist, we combined all SNPs in these projects. On average, ~100,000 SNPs were identified in a cancer type. For each cancer type, we calculated the average intrinsic DNA curvature of the flanking DNA sequences of all SNPs (from 50 bp upstream to 50 bp downstream of each SNP). We also randomly chose the same number of sites in the human genome and calculated the average intrinsic DNA curvature of their flanking sequences similarly. This procedure was repeated 1,000 times to obtain the distribution of the expected average intrinsic DNA curvature. *P* values were calculated as the fraction of sets of random sites exhibiting a smaller average intrinsic DNA curvature than that of the observed SNP sites, among 1,000 permutations. In TCGA, different methods were used to identify mutations (Mutect, Muse, Somaticsniper, and VarScan). Our conclusion held under each kind of method used in calling SNPs (**Figs. S4-6**).

### **Data retrieval**

Protein-protein interaction (PPI) data in yeast were downloaded from *Saccharomyces* Genome Database [52]. Lists of essential genes and haploinsufficient genes were retrieved from a previous study [53]. Genes leading to significant growth reduction upon deletion were identified in a previous study with Bar-seq [54]. Duplicate genes in the yeast genome were defined in a previous study [55]. PPI data in humans were downloaded from Biogrid [56]. Human essential genes were retrieved from two previous studies [57, 58], respectively. The list of haploinsufficient genes in humans were retrieved from a previous study [59].

## **DECLARATIONS**

### **Ethics approval and consent to participate**

Not applicable.

### **Consent for publication**

Not applicable.

### **Availability of data and material**

The raw sequencing data have been deposited to the Genome Sequence Archive in BIG Data Center (<http://bigd.big.ac.cn/gsa>) under accession number CRA000570.

### **Competing interests**

The authors declare that they have no competing interests

### **Funding**

This work was supported by grants from the National Natural Science Foundation of China to X.H. and W.Q. (91731302).

### **Authors' contributions**

C.D., L.B.C., X.H., and W.Q. designed the experiments. C.D., Q.H., and X.C. performed the experiments. C.D., Q.H., and W.Q. analyzed the data. C.D., S.W., L.B.C., and W.Q. wrote the manuscript.

### **Acknowledgements**

We thank Yuliang Zhang for technical support in data analysis, and Mengyi Sun and Jian-Rong Yang for critical reading of the manuscript.

## REFERENCES

1. Hodgkinson A, Eyre-Walker A: **Variation in the mutation rate across mammalian genomes.** *Nat Rev Genet* 2011, **12**:756-766.
2. Schuster-Bockler B, Lehner B: **Chromatin organization is a major influence on regional mutation rates in human cancer cells.** *Nature* 2012, **488**:504-507.
3. Frigola J, Sabarinathan R, Mularoni L, Muinos F, Gonzalez-Perez A, Lopez-Bigas N: **Reduced mutation rate in exons due to differential mismatch repair.** *Nat Genet* 2017.
4. Prendergast JG, Campbell H, Gilbert N, Dunlop MG, Bickmore WA, Semple CA: **Chromatin structure and evolution in the human genome.** *BMC Evol Biol* 2007, **7**:72.
5. Lang GI, Murray AW: **Mutation rates across budding yeast chromosome VI are correlated with replication timing.** *Genome Biol Evol* 2011, **3**:799-811.
6. Stamatoyannopoulos JA, Adzhubei I, Thurman RE, Kryukov GV, Mirkin SM, Sunyaev SR: **Human mutation rate associated with DNA replication timing.** *Nat Genet* 2009, **41**:393-395.
7. Chen CL, Rappailles A, Duquenne L, Huvet M, Guilbaud G, Farinelli L, Audit B, d'Aubenton-Carafa Y, Arneodo A, Hyrien O, Thermes C: **Impact of replication timing on non-CpG and CpG substitution rates in mammalian genomes.** *Genome Res* 2010, **20**:447-457.
8. Weber CC, Pink CJ, Hurst LD: **Late-Replicating Domains Have Higher Divergence and Diversity in *Drosophila melanogaster*.** *Molecular Biology and Evolution* 2012, **29**:873-882.
9. Supek F, Lehner B: **Differential DNA mismatch repair underlies mutation rate variation across the human genome.** *Nature* 2015, **521**:81-84.
10. Herman RK, Dworkin NB: **Effect of gene induction on the rate of mutagenesis by ICR-191 in *Escherichia coli*.** *J Bacteriol* 1971, **106**:543-550.
11. Park C, Qian W, Zhang J: **Genomic evidence for elevated mutation rates in highly expressed genes.** *EMBO Rep* 2012, **13**:1123-1129.
12. Savic DJ, Kanazir DT: **The effect of a histidine operator-constitutive mutation on UV-induced mutability within the histidine operon of *Salmonella typhimurium*.** *Mol Gen Genet* 1972, **118**:45-50.
13. Chen X, Yang JR, Zhang J: **Nascent RNA folding mitigates transcription-associated mutagenesis.** *Genome Res* 2016, **26**:50-59.
14. Hanawalt PC, Spivak G: **Transcription-coupled DNA repair: two decades of progress and surprises.** *Nat Rev Mol Cell Biol* 2008, **9**:958-970.
15. Coulondre C, Miller JH, Farabaugh PJ, Gilbert W: **Molecular basis of base substitution hotspots in *Escherichia coli*.** *Nature* 1978, **274**:775-780.
16. Aggarwala V, Voight BF: **An expanded sequence context model broadly explains variability in polymorphism levels across the human genome.** *Nat Genet* 2016, **48**:349-355.
17. Zhu YO, Siegal ML, Hall DW, Petrov DA: **Precise estimates of mutation rate and spectrum in yeast.** *Proc Natl Acad Sci U S A* 2014, **111**:E2310-2318.
18. Blake RD, Hess ST, Nicholson-Tuell J: **The influence of nearest neighbors on the rate and pattern of spontaneous point mutations.** *J Mol Evol* 1992, **34**:189-200.
19. Olson WK, Gorin AA, Lu XJ, Hock LM, Zhurkin VB: **DNA sequence-dependent deformability deduced from protein-DNA crystal complexes.** *Proc Natl Acad Sci U S A* 1998, **95**:11163-11168.
20. Harteis S, Schneider S: **Making the bend: DNA tertiary structure and protein-DNA interactions.** *Int J Mol Sci* 2014, **15**:12335-12363.
21. Rohs R, West SM, Sosinsky A, Liu P, Mann RS, Honig B: **The role of DNA shape in protein-DNA recognition.** *Nature* 2009, **461**:1248-1253.

22. Lang GI, Murray AW: **Estimating the per-base-pair mutation rate in the yeast *Saccharomyces cerevisiae*.** *Genetics* 2008, **178**:67-82.
23. Lee W, Tillo D, Bray N, Morse RH, Davis RW, Hughes TR, Nislow C: **A high-resolution atlas of nucleosome occupancy in yeast.** *Nat Genet* 2007, **39**:1235-1244.
24. Bolshoy A, McNamara P, Harrington RE, Trifonov EN: **Curved DNA without A-A: experimental estimation of all 16 DNA wedge angles.** *Proc Natl Acad Sci U S A* 1991, **88**:2312-2316.
25. Wolfe KH, Sharp PM, Li WH: **Mutation rates differ among regions of the mammalian genome.** *Nature* 1989, **337**:283-285.
26. Chen X, Chen Z, Chen H, Su Z, Yang J, Lin F, Shi S, He X: **Nucleosomes suppress spontaneous mutations base-specifically in eukaryotes.** *Science* 2012, **335**:1235-1238.
27. Fares MA, Keane OM, Toft C, Carretero-Paulet L, Jones GW: **The roles of whole-genome and small-scale duplications in the functional specialization of *Saccharomyces cerevisiae* genes.** *PLoS Genet* 2013, **9**:e1003176.
28. Pleasance ED, Cheetham RK, Stephens PJ, McBride DJ, Humphray SJ, Greenman CD, Varela I, Lin ML, Ordóñez GR, Bignell GR, et al: **A comprehensive catalogue of somatic mutations from a human cancer genome.** *Nature* 2010, **463**:191-196.
29. Cancer Genome Atlas Research Network, Weinstein JN, Collisson EA, Mills GB, Shaw KR, Ozenberger BA, Ellrott K, Shmulevich I, Sander C, Stuart JM: **The Cancer Genome Atlas Pan-Cancer analysis project.** *Nat Genet* 2013, **45**:1113-1120.
30. Hagerman PJ: **Sequence-directed curvature of DNA.** *Nature* 1986, **321**:449-450.
31. Koo HS, Wu HM, Crothers DM: **DNA bending at adenine . thymine tracts.** *Nature* 1986, **320**:501-506.
32. Ulanovsky LE, Trifonov EN: **Estimation of wedge components in curved DNA.** *Nature* 1987, **326**:720-722.
33. Luria SE, Delbruck M: **Mutations of bacteria from virus sensitivity to virus resistance.** *Genetics* 1943, **28**:491-511.
34. Maki H: **Origins of spontaneous mutations: specificity and directionality of base-substitution, frameshift, and sequence-substitution mutageneses.** *Annu Rev Genet* 2002, **36**:279-303.
35. Alexandrov LB, Nik-Zainal S, Wedge DC, Campbell PJ, Stratton MR: **Deciphering signatures of mutational processes operative in human cancer.** *Cell Rep* 2013, **3**:246-259.
36. Lawrence MS, Stojanov P, Polak P, Kryukov GV, Cibulskis K, Sivachenko A, Carter SL, Stewart C, Mermel CH, Roberts SA, et al: **Mutational heterogeneity in cancer and the search for new cancer-associated genes.** *Nature* 2013, **499**:214-218.
37. Polak P, Karlic R, Koren A, Thurman R, Sandstrom R, Lawrence M, Reynolds A, Rynes E, Vlahovicek K, Stamatoyannopoulos JA, Sunyaev SR: **Cell-of-origin chromatin organization shapes the mutational landscape of cancer.** *Nature* 2015, **518**:360-364.
38. Hurst LD, Smith NG: **Do essential genes evolve slowly?** *Curr Biol* 1999, **9**:747-750.
39. Hirsh AE, Fraser HB: **Protein dispensability and rate of evolution.** *Nature* 2001, **411**:1046-1049.
40. Wang Z, Zhang J: **Why is the correlation between gene importance and gene evolutionary rate so weak?** *PLoS Genet* 2009, **5**:e1000329.
41. Liao BY, Scott NM, Zhang J: **Impacts of gene essentiality, expression pattern, and gene compactness on the evolutionary rate of mammalian proteins.** *Mol Biol Evol* 2006, **23**:2072-2080.
42. Zhang J, Yang JR: **Determinants of the rate of protein sequence evolution.** *Nat Rev Genet* 2015, **16**:409-420.
43. Li C, Qian W, Maclean CJ, Zhang J: **The fitness landscape of a tRNA gene.** *Science* 2016, **352**:837-840.

44. Puchta O, Cseke B, Czaja H, Tollervey D, Sanguinetti G, Kudla G: **Network of epistatic interactions within a yeast snoRNA.** *Science* 2016, **352**:840-844.
45. He X, Liu L: **EVOLUTION. Toward a prospective molecular evolution.** *Science* 2016, **352**:769-770.
46. Ponomarenko JV, Ponomarenko MP, Frolov AS, Vorobyev DG, Overton GC, Kolchanov NA: **Conformational and physicochemical DNA features specific for transcription factor binding sites.** *Bioinformatics* 1999, **15**:654-668.
47. Wal M, Pugh BF: **Genome-wide mapping of nucleosome positions in yeast using high-resolution MNase ChIP-Seq.** *Methods Enzymol* 2012, **513**:233-250.
48. Langmead B, Salzberg SL: **Fast gapped-read alignment with Bowtie 2.** *Nat Methods* 2012, **9**:357-359.
49. Wang Y, Song F, Zhu J, Zhang S, Yang Y, Chen T, Tang B, Dong L, Ding N, Zhang Q, et al: **GSA: Genome Sequence Archive.** *Genomics Proteomics Bioinformatics* 2017, **15**:14-18.
50. Lorenz R, Bernhart SH, Honer Zu Siederdisen C, Tafer H, Flamm C, Stadler PF, Hofacker IL: **ViennaRNA Package 2.0.** *Algorithms Mol Biol* 2011, **6**:26.
51. Chen S, Li K, Cao W, Wang J, Zhao T, Huan Q, Yang YF, Wu S, Qian W: **Codon-resolution analysis reveals a direct and context-dependent impact of individual synonymous mutations on mRNA level.** *Mol Biol Evol* 2017.
52. Christie KR, Weng S, Balakrishnan R, Costanzo MC, Dolinski K, Dwight SS, Engel SR, Feierbach B, Fisk DG, Hirschman JE, et al: **Saccharomyces Genome Database (SGD) provides tools to identify and analyze sequences from Saccharomyces cerevisiae and related sequences from other organisms.** *Nucleic Acids Res* 2004, **32**:D311-314.
53. Deutschbauer AM, Jaramillo DF, Proctor M, Kumm J, Hillenmeyer ME, Davis RW, Nislow C, Gaeveer G: **Mechanisms of haploinsufficiency revealed by genome-wide profiling in yeast.** *Genetics* 2005, **169**:1915-1925.
54. Qian W, Ma D, Xiao C, Wang Z, Zhang J: **The genomic landscape and evolutionary resolution of antagonistic pleiotropy in yeast.** *Cell Rep* 2012, **2**:1399-1410.
55. Qian W, Zhang J: **Genomic evidence for adaptation by gene duplication.** *Genome Res* 2014, **24**:1356-1362.
56. Chatr-Aryamontri A, Oughtred R, Boucher L, Rust J, Chang C, Kolas NK, O'Donnell L, Oster S, Theesfeld C, Sellam A, et al: **The BioGRID interaction database: 2017 update.** *Nucleic Acids Res* 2017, **45**:D369-D379.
57. Hart T, Chandrashekhar M, Aregger M, Steinhart Z, Brown KR, MacLeod G, Mis M, Zimmermann M, Fradet-Turcotte A, Sun S, et al: **High-Resolution CRISPR Screens Reveal Fitness Genes and Genotype-Specific Cancer Liabilities.** *Cell* 2015, **163**:1515-1526.
58. Wang T, Birsoy K, Hughes NW, Krupczak KM, Post Y, Wei JJ, Lander ES, Sabatini DM: **Identification and characterization of essential genes in the human genome.** *Science* 2015, **350**:1096-1101.
59. Huang N, Lee I, Marcotte EM, Hurles ME: **Characterising and predicting haploinsufficiency in the human genome.** *PLoS Genet* 2010, **6**:e1001154.



## TABLE

**Table 1. Models on predicting the mutation rate of a potential nonsense site in *URA3***

|   | <b>Model</b>                                                       | <b>AIC</b> |
|---|--------------------------------------------------------------------|------------|
| 1 | Null model                                                         | 484        |
| 2 | Mutation rate $\sim$ “0” *                                         | 418        |
| 3 | Mutation rate $\sim$ “0” + “+1” + “-1”                             | 426        |
| 4 | Mutation rate $\sim$ “0” + “+1” + “+2” + “+3” + “-1” + “-2” + “-3” | 432        |
| 5 | Mutation rate $\sim$ curvature **                                  | 433        |
| 6 | Mutation rate $\sim$ “0” + curvature                               | 414        |

\* “0” represents the nucleotide at the potential nonsense site. “+1” and “-1” represent the upstream and the downstream nucleotide of the potential nonsense site, respectively.

\*\* The intrinsic DNA curvature in a region from 50 bp upstream to 50 bp downstream of the potential nonsense site.

## FIGURES

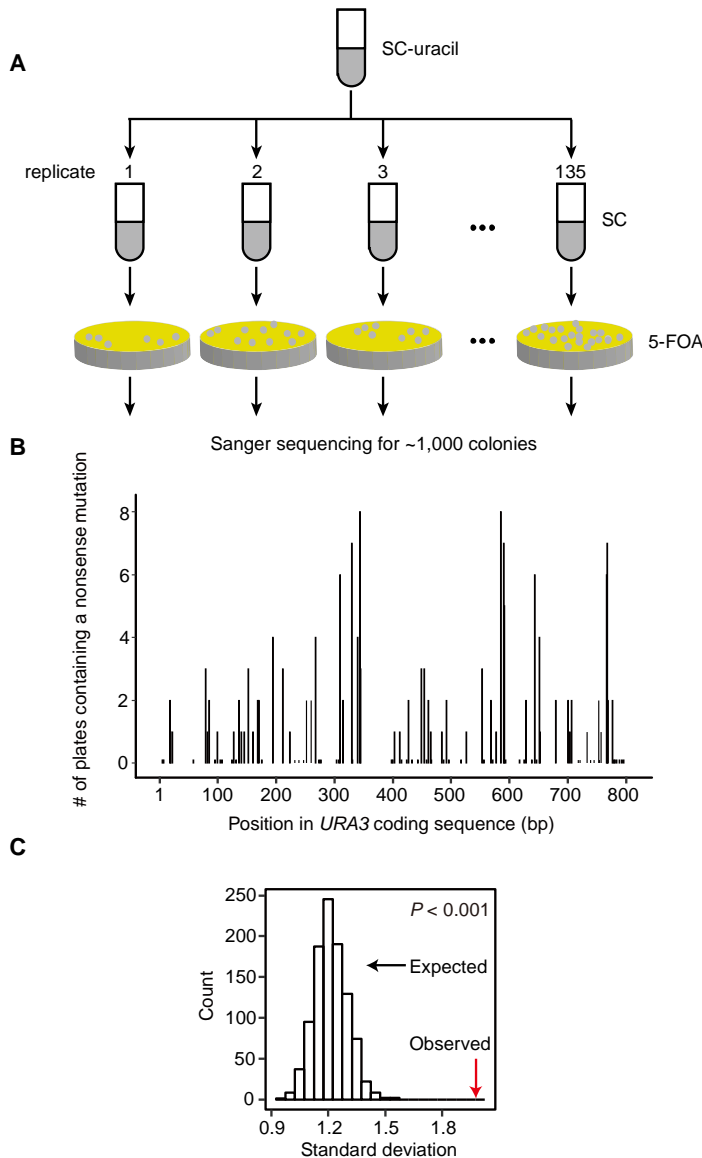

**Fig. 1. The mutational landscape of *URA3*.**

(A) A schematic description of the experimental design. Mutations were accumulated in SC liquid medium and *ura3* mutants were selected on 5-FOA plates.

(B) Mutational landscape of all potential nonsense mutation sites, which were defined as sites where a point mutation can result in a stop codon. Each bar represents a potential nonsense mutation site.

(C) The observed (red arrow) and expected (histogram showing 1,000 permutations) standard deviation of the numbers of nonsense mutations on all potential nonsense mutation sites of *URA3*.

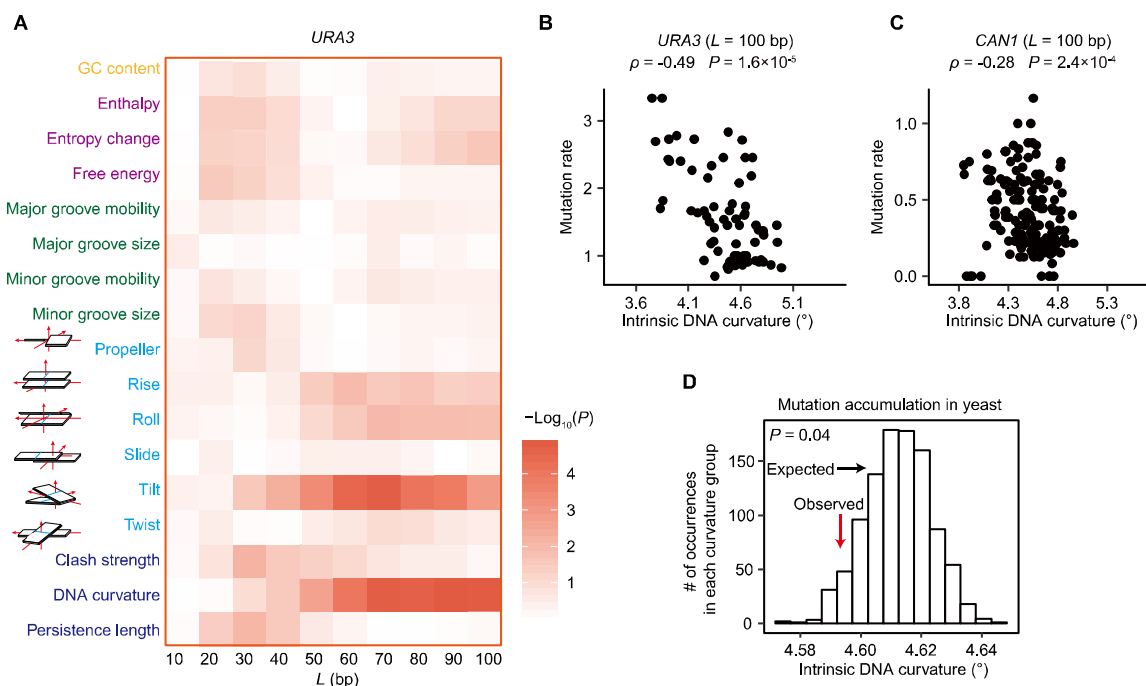

**Fig.2. Intrinsic DNA curvature is negatively correlated with mutation rate.**

(A) Correlation between mutation rate and the value of each DNA feature in sliding windows (window length  $L$ ). These features include GC content (orange), thermodynamic characteristics (purple), groove properties (green), intra- and inter-base pair DNA shape features (cyan), and integrated DNA shape features (blue). Intra- and inter-base pair DNA shape features are shown in cartoons, where a square represents a base and a rectangle represents a base pair.  $P$  values were calculated from the Spearman's correlation.

(B-C) Example scatter plots of *URA3* (B) and of *CAN1* (C). Each dot represents a region of length  $L$  ( $= 100$  bp).

(D) The average intrinsic DNA curvature of DNA regions surrounding the 882 observed mutation sites (red arrow) was significantly smaller than the random expectation (histogram showing 1,000 permutations) in the yeast genome.  $P$  value was calculated with a permutation test.

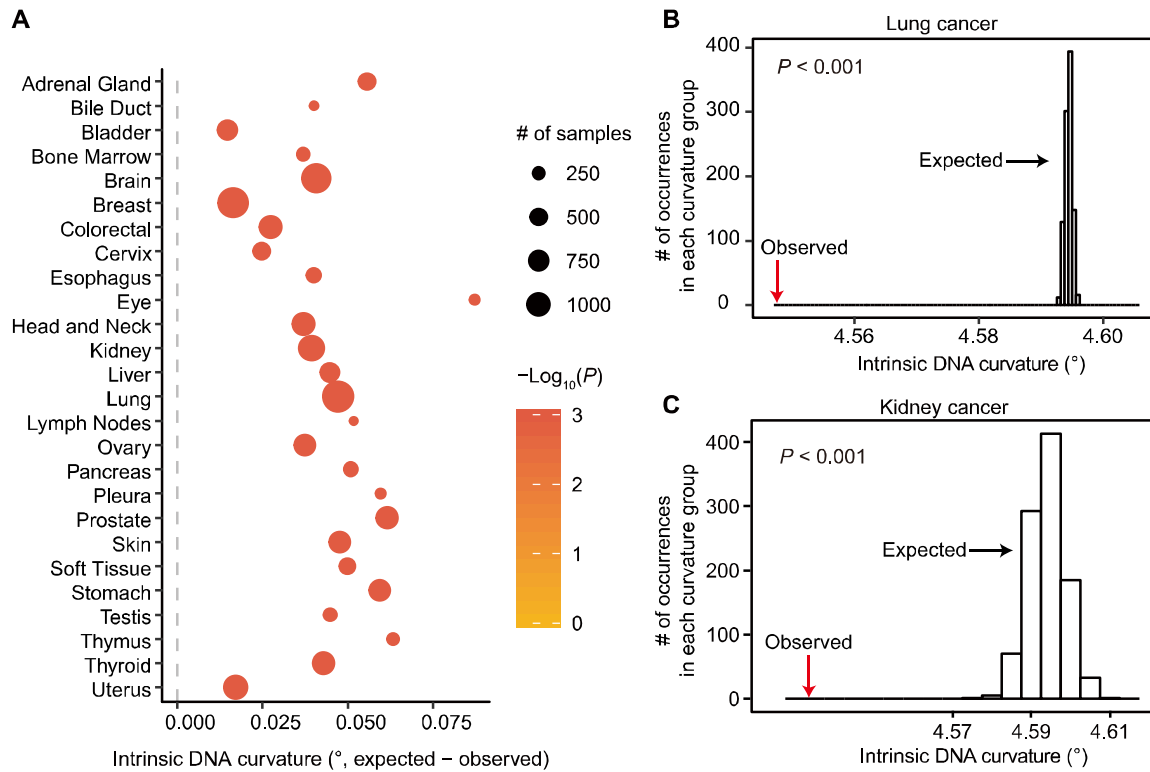

**Fig. 3. Mutations in human cancer samples are enriched in DNA regions with a smaller intrinsic DNA curvature.**

(A) Mutations are enriched in regions with a significantly smaller curvature in all 26 cancer types. Each dot represents a cancer type.  $P$  values were calculated based on the permutation test.  $P$  values were arbitrarily assigned to 0.001 when  $P < 0.001$ .

(B-C) Examples in lung (B) and in kidney (C) showing that the average intrinsic DNA curvature of SNP-containing regions (red arrows) was significantly smaller than the random expectation (histogram showing 1,000 permutations).

**Fig. 4. Changing the intrinsic DNA curvature in *URA3* leads to altered mutation rate.**

(A) The distribution of the average intrinsic DNA curvature of genes in the yeast genome. The intrinsic DNA curvatures of five synonymous variants of *URA3* are indicated by arrows. S1 and S2 (G1 and G2) are variants with a smaller (greater) intrinsic DNA curvature.

(B) The schematic description of the experimental procedure for measuring the relative mutation rate of *URA3* variants.

(C) Reduction of intrinsic DNA curvature leads to an increase in the mutation rate of *URA3*. Outliers are not shown. *P* values were calculated from the one-tailed Mann-Whitney *U* test.

(D) Similar to (C), in a mismatch repair deficient *msh2* strain.

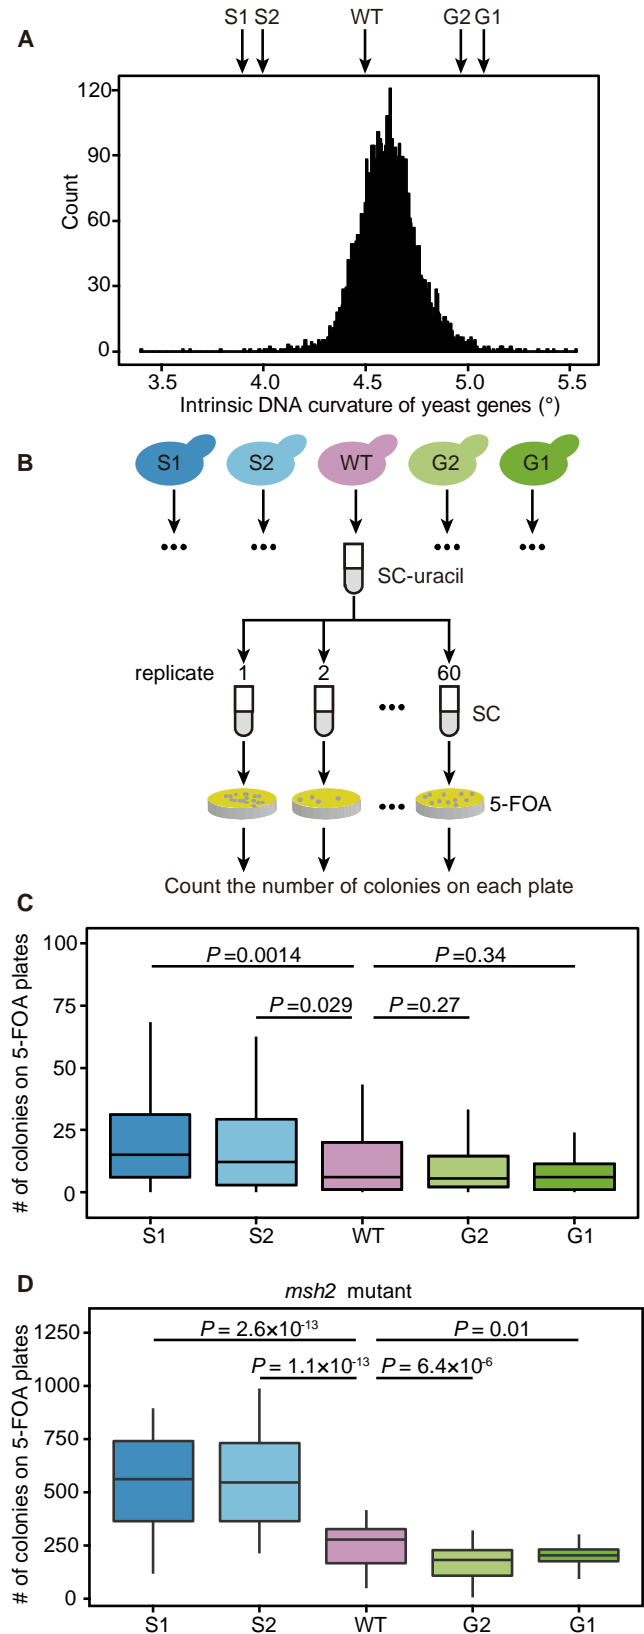

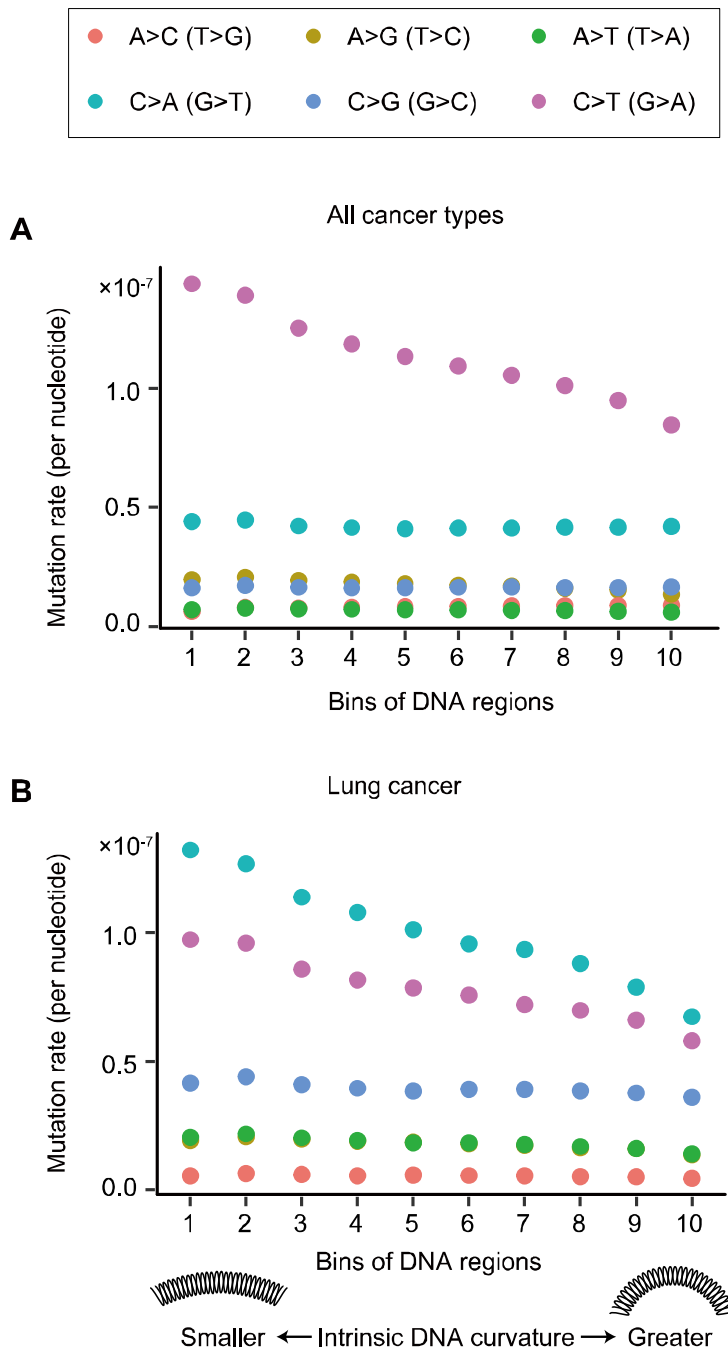

**Fig. 5. DNA curvature suppresses mutations that are induced by mutagens.**

(A) The mutation rate of each of the six mutation types in cancer cells. Mutation rate was defined as the number of SNPs per cancer sample per nucleotide. x axis shows ten equally sized bins of DNA regions in the human genome sorted by intrinsic DNA curvature.

(B) Mutation rates in lung cancer (including lung adenocarcinoma and lung squamous cell carcinoma).
